# Supplementary material for: Sporting programs aimed at inactive population groups in the Netherlands: factors influencing their long-term sustainability in the organized sports setting
Source: BMC Sports Sci Med Rehabil. 2019 Nov 19;11:33. doi: 10.1186/s13102-019-0137-5 (PMC6862784; doi:10.1186/s13102-019-0137-5)
Supplement: Supplementary file 1 — Additional file 1. Theoretical framework of factors. Presents an overview of factors influencing the sustainability of health promotion programs from previous literature, ordered per main theme and subthemes. [file 13102_2019_137_MOESM1_ESM.xlsx]

## Sheet: Blad1
Main theme	Factor summarized (subtheme)	Name of factor in literature	Description of factor in literature	References
1. Program design factors
	Stakeholder involvement	Project negotiation process	Project approaches and goals are discussed with recipient community members as equal partners (addressing everyone's needs: donors, community, technical experts).	Shediac-Rizkallah & Bone, 1998
		Mutually respectful negotiating process	Project that is designed and approved in a mutually respectful negotiating process involving implementers and national government.	Bossert, 1990
		Stakeholders' involvement in program design	Stakeholders are aware of the program and are involved in its development.	Casey et al., 2009
		Stakeholders' involvement in program design	People with a stake in the program - funders, administrators, consumers/beneficiaries, other agencies - have been aware of the program and/or involved in its development.	Hawe et al., 1999
		Host organization's support to the program in the past	The organization which you intend to host the program in the future has been making some real or in kind support to the program in the past.	Hawe et al., 1999
		Stakeholder involvement/support	No description.	Wiltsey Stirman et al., 2012
		Shared decision making among stakeholders	No description.	Wiltsey Stirman et al., 2012
		Community involvement in development program goals	The community is engaged in the development of program goals.	Schell et al., 2013
		Community involvement and ownership	Program is developed, implemented and evaluated with widespread community involvement and ownership.	Whitley et al., 2015
	Program adaptation	Ability to be modified/modifications made	The intervention or program can be modified.	Wiltsey Stirman et al., 2012
		Adaptation/alignment	Adaptation of the intervention to improve fit/alignment between the innovation and the setting.	Wiltsey Stirman et al., 2012
		Program adaptation	Actions are taken to adapt the program to ensure its ongoing effectiveness: The program periodically reviews the evidence base; it adapts strategies as needed; it adapts to new science; it proactively adapts to changes in the environment; it makes decisions about which components are ineffective and should not continue.	Schell et al., 2013
		Program modifiable	A program can be modified over time.	Scheirer, 2005
	Project type	Project type	More resources are allocated to curative than to preventive care.	Shediac-Rizkallah & Bone, 1998
	Program fidelity	Ability to maintain fidelity/integrity	Degree to which an intervention or program is delivered as intended.	Wiltsey Stirman et al., 2012
	Procedural clarity	Procedural clarity	The innovation clearly describes which steps/activities should be performed and in which order.	Fleuren et al., 2014
	Correctness	Correctness	The innovation is based on factually correct knowledge.	Fleuren et al., 2014
	Completeness	Completeness	The innovation provides all the information and materials needed to work with it properly.	Fleuren et al., 2014
	Complexity	Complexity	The innovation is not too complex to implement/use.	Fleuren et al., 2014
2. Implementation factors
	Program evaluation	Evaluation and feedback	No description.	Wiltsey Stirman et al., 2012
		Program evaluation	The program has the capacity for quality program evaluation.	Schell et al., 2013
		Program evaluation	The program reports short-term and intermediate outcomes.	Schell et al., 2013
		Program evaluation	Evaluation results inform planning and implementation.	Schell et al., 2013
		Program evaluation	Program evaluation results are used to demonstrate successes to funders and other key stakeholders.	Schell et al., 2013
		Program evaluation	The program provides strong evidence to the public that the program works.	Schell et al., 2013
		Monitoring and evaluation	This includes both monitoring (i.e. formative evaluation), when programs are assessed during development or early implementation to determine ways in which the program can be improved, as well as summative evaluation, when programs are assessed in order to decide whether a program should be continued, expanded, modified, or ended.	Whitley et al., 2015
	Program effectiveness	Project effectiveness	Project has been shown to be effective (perceived as effective, visible effects).	Shediac-Rizkallah & Bone, 1998
		Perceived project effectiveness	Project that achieves its expected goals and objectives with a relatively efficient use of resources.	Bossert, 1990
		Program effectiveness	The program has shown itself to be effective. Effects are visible and acknowledged.	Hawe et al., 1999
		Visibility	The outcomes (effects) of using the innovation are clearly observable (for the user).	Fleuren et al., 2014
		Effectiveness or benefit	No description.	Wiltsey Stirman et al., 2012
		Program effectiveness (program evaluation)	The program provides strong evidence to the public that the program works.	Schell et al., 2013
	Training and education	Training	Training of professionals and para-professionals.	Shediac-Rizkallah & Bone, 1998
		Training	Project with strong training components, including professional training and para-professional training.	Bossert, 1990
		Training	Formal and informal training of staff in the program (i.e. training new skills in health promotion and partnership development).	Casey et al., 2009
		Training	The program has involved formal and/or informal training of people whose skills and interests are retained in the program or its immediate environment.	Hawe et al., 1999
		Training and education	No description.	Wiltsey Stirman et al., 2012
		Knowledge translation	Partner training, technical assistance and continuing education, with a focus on building the capacity of all partners in community-based programs, including leadership development.	Whitley et al., 2015
	Funding period	Project duration	Long funding period.	Shediac-Rizkallah & Bone, 1998
		Duration of funding	Financial support over a long period of time.	Swerissen & Crisp, 2004
3. Factors on the level of the user/implementer (trainer/coach of sports club)
	Personal benefits/drawbacks	Personal benefits/drawbacks	The innovation has advantages for the user/implementer.	Fleuren et al., 2014
		Perceived benefits	Staff members or key stakeholders perceive benefits to themselves and/or clients.	Scheirer, 2005
	Relevance for client	Relevance for client	The user believes the innovation is relevant for his/her client.	Fleuren et al., 2014
		Perceived benefits	Staff members or key stakeholders perceive benefits to themselves and/or clients.	Scheirer, 2005
	Outcome expectations	Outcome expectations	The user thinks it is important to achieve the client objectives as intended by the innovation and expects that the innovation will actually achieve these objectives.	Fleuren et al., 2014
	Professional obligation	Professional obligation	The innovations fits in the tasks for which the user feels responsible when doing his/her work. The user feels it as his/her responsibility as a professional to use the innovation.	Fleuren et al., 2014
	Client satisfaction	Client satisfaction	The user thinks that his of her clients will (in general) be satisfied with the innovation.	Fleuren et al., 2014
	Client cooperation	Client cooperation	The user thinks that his or her clients will (in general) cooperate when using the innovation.	Fleuren et al., 2014
	Social support	Social support	The user expects or experiences support from important social referents relating to the use of the innovation (e.g. colleagues, other professionals they work with, heads of department or management).	Fleuren et al., 2014
	Descriptive norm	Descriptive norm	Colleagues' observed behavior: degree to which other colleagues use the innovation.	Fleuren et al., 2014
	Subjective norm	Subjective norm	The influence of important others on the use of the innovation: the extent that they expect the user to use the innovation and the extent to which the user complies with their opinions.	Fleuren et al., 2014
	Self-efficacy	Self-efficacy	The user believes he or she is able to implement the activities involved in the innovation.	Fleuren et al., 2014
	Knowledge	Knowledge	The user has the knowledge needed to use the innovation.	Fleuren et al., 2014
	Awareness of content of the innovation	Awareness of content of the innovation	The user has learnt about the content of the innovation.	Fleuren et al., 2014
4. Factors within the organizational setting (of NSF/sports club)
	Program financing	Project financing	Enough sources to fund the program (internal, external, mixture). Community can afford the program.	Shediac-Rizkallah & Bone, 1998
		Financing	Availability of sources of funds for continuing project activities after donor's funding for a project stops.	Bossert, 1990
		Financial resources for needs assessment	Financial resources for community needs assessment to ensure the program fits with the community and policy environment.	Casey et al., 2009
		Financing	Ability to generate enough (new) financial resources.	Casey et al., 2009
		Relationship with funder	Good relationship with funder.	Casey et al., 2009
		Financing	Prospects for the program to acquire or generate some additional funds or resources for the future are good.	Hawe et al., 1999
		Financing	Enough financial resources.	Swerissen & Crisp, 2004
		Financial resources	There are enough financial resources available to use the innovation as intended.	Fleuren et al., 2014
		Funding	No description.	Wiltsey Stirman et al., 2012
		Funding stability	Establishing a consistent financial base for the program: the program is funded through a variety of sources; the program has a combination of stable and flexible funding; the program has sustained funding.	Schell et al., 2013
		Financial resources	The organization (National Sports Federation/sports club) has sufficient financial resources available to continue the program.	Ooms et al., 2015
		Funding from other sources	Funding from other sources, particularly the availability of a larger number of funding sources or the transfer of support to local governmental sources.	Scheirer, 2005
		Securing funding	Secure and maintain sustainable funding: diverse funding sources, partnering with others for financial resources taking into account their needs.	Whitley et al., 2015
	Program integration	Integration with existing programs/services	Program is integrated into the standard operating practices of its host organization. The mission of the program is compatible with the mission and activities of its host organization.	Shediac-Rizkallah & Bone, 1998
		Project integration	Project is integrated into the existing institutional hierarchies.	Bossert, 1990
		Complementary to and integration in existing programs	Program complements other programs and is integrated within existing programs	Casey et al., 2009
		Integration in host organization	Part of the program's essential 'business' is integrated into other aspects of the host organization, e.g. in policies, practices, responsibilities, etc. That is, the program does not simply exist as an entirely separate entity.	Hawe et al., 1999
		Integration of rules/policies	Integration of program into policies.	Wiltsey Stirman et al., 2012
		Integration in policies	The program implements policies to help ensure sustained funding.	Schell et al., 2013
		Program integration	The program is well integrated into the operations of the organization.	Schell et al., 2013
		Integration in policy	The program is part of the organization's (National Sports Federation/sports club) long-term policy.	Ooms et al., 2015
	Program champion (internal)	Program champion/leadership	Influential individuals within the organization are advocates of continuation of the program (or external program champion).	Shediac-Rizkallah & Bone, 1998
		Program champion	Influential individuals within the organization that act as advocates of continuation of the program.	Casey et al., 2009
		Program champion	There is someone in authority or seniority, other than the director of the program itself, who is an advocate for the program at high levels in the organization.	Hawe et al., 1999
		Champions (internal)	No description.	Wiltsey Stirman et al., 2012
		Program champion	Champions exist who strongly support the program.	Schell et al., 2013
		Program champion with ability to garner resources	The program has strong champions with the ability to garner resources.	Schell et al., 2013
		Program champion	A person who is strategically located to have access to upper management and also has influence on, or control over, day-to-day program operations. The champion enthusiastically advocates for the needs of the program, particularly to help secure resources for its continuation.	Scheirer, 2005
	Program's compatibility with organization's mission and activities	Health promotion fits organization's mission	The organization's needs and interests fit the goals of the intervention study.	Weisbrod et al., 1992
		Compatibility of the program with the core values and focus areas of the organization	Program aligns with organizational values and focus areas, such as capacity building, partnership development and participation in physical activity.	Casey et al., 2009
		Program mission is compatible with mission and activities of host organization	The mission of the program is compatible with the mission and activities of the intended host organization.	Hawe et al., 1999
		Compatibility	The innovation is compatible with the values and working method in place.	Fleuren et al., 2014
		Fit	The fit of the program or intervention with the system or organization.	Wiltsey Stirman et al., 2012
		Fit	The program fits with its organization's existing mission and standard operating procedures.	Scheirer, 2005
	Organizational strength	Institutional strength	Mature (developed, stable, resourceful) organization that is implementing the program (host organization).	Shediac-Rizkallah & Bone, 1998
		Institutional strength	Strong well-integrated implementing institutions with goal structures that are consistent with the project goals, that have strong leadership and relatively high skill levels.	Bossert, 1990
		Organization with mature subsystems	Mature organization that is implementing the program, having independent resources and staff. Working through existing larger organizations.	Weisbrod et al., 1992
		Mature host organization	The organization that you intend to host the program in de future is mature (developed, stable, resourceful). It is likely to provide a strong organizational base for the program.	Hawe et al., 1999
		Supportive organizational systems	Organizational systems are in place to support the various program needs.	Schell et al., 2013
	Internal support	Support for the program within the organization	The program is well supported in the organization. That is, it is not under threat and there are few rivals in the organization who could benefit from the closure of the program.	Hawe et al., 1999
		Leadership support within the larger organization	The program has leadership support from within the larger organization.	Schell et al., 2013
		Formal ratification by management	The management has set up formal arrangements in the organization relating to the use of the innovation (in policy plans, work plans, etc.).	Fleuren et al., 2014
		Ongoing support	No description.	Wiltsey Stirman et al., 2012
	Leadership	Leadership	No description.	Wiltsey Stirman et al., 2012
		Leadership	Leadership effectively articulates the vision of the program to external partners.	Schell et al., 2013
		Leadership	Leadership effectively manages staff and other resources.	Schell et al., 2013
	Staff capacity	Staff capacity	There are enough people in the organization to use the innovation as intended.	Fleuren et al., 2014
		Workforce (staffing, attributes)	Stability and attributes of workforce, such as their skills and attitudes.	Wiltsey Stirman et al., 2012
		Adequate staff	The program has adequate staff to complete the program goals.	Schell et al., 2013
	Retention of program staff	Retention of program staff	Program staff is retained in the program.	Casey et al., 2009
		Retention of program staff	The program has involved formal and/or informal training of people whose skills and interests are retained in the program or its immediate environment.	Hawe et al., 1999
		Replacement when staff leave	In the organization, there are arrangements in place so that staff who use the innovation and leave the organization are replaced in good time by employees who are/will be adequately prepared to take over.	Fleuren et al., 2014
	Material resources and facilities	Resources	No description.	Wiltsey Stirman et al., 2012
		Material resources and facilities	Presence of materials and other resources or facilities necessary for the use of the innovation as intended (such as equipment, material and space).	Fleuren et al., 2014
	Organizational change	System/policy change	No description.	Wiltsey Stirman et al., 2012
		Unsettled organization	There are other changes in progress (organizational or otherwise) that represent obstacles to the process of implementing the innovation, such as re-organizations, mergers, cuts, staffing changes or the simultaneous implementation of different innovations.	Fleuren et al., 2014
	Strategic planning	Planning	No description.	Wiltsey Stirman et al., 2012
		Strategic planning	Processes are used that guide the program's direction, goals and strategies: The program plans for future resource needs, has a long-term financial plan and has a sustainability plan. The program's goals are understood by all stakeholders and the program clearly outlines roles and responsibilities for all stakeholders.	Schell et al., 2013
	(Perceived) benefits	Personal benefits/drawbacks	The innovation has advantages for the user/implementer.	Fleuren et al., 2014
		Perceived benefits	Staff members or key stakeholders perceive benefits to themselves and/or clients.	Scheirer, 2005
	Coordinator	Coordinator	Presence of one or two persons responsible for coordinating the implementation of the innovation in the organization.	Fleuren et al., 2014
	Time available	Time available	There is enough time available to use the innovation in day-to-day (work) activities.	Fleuren et al., 2014
	Information accessible about use of innovation	Information accessible about use of innovation	It is easy to find information in the organization about using the innovation as intended.	Fleuren et al., 2014
	Performance feedback	Performance feedback	In the organization, feedback is regularly provided (to the user/implementer) about progress with the implementation of the innovation.	Fleuren et al., 2014
	Organizational culture	Organizational culture	No description.	Wiltsey Stirman et al., 2012
	Organizational climate	Organizational climate	No description.	Wiltsey Stirman et al., 2012
	Setting characteristics (structure, policies)	Setting characteristics (structure, policies)	No description.	Wiltsey Stirman et al., 2012
	History of innovations	History of innovations	The intended host organization has a history of innovation or developing new responses to situations in its environment.	Hawe et al., 1999
5. Factors in the broader community environment
	Partnerships	Supportive partnerships	Network of organizations that advocates for the program.	Casey et al., 2009
		Supportive partnerships	People in the community, or other agencies and organizations, will advocate for and maintain a demand for the existence of the program should it be threatened.	Hawe et al., 1999
		Supportive partnerships	Organizations that are similar to the intended host organization have taken steps of supporting programs somewhat like your program.	Hawe et al., 1999
		Collaboration/partnership	No description.	Wiltsey Stirman et al., 2012
		Partnerships	Cultivating connections between the program and its stakeholders.	Schell et al., 2013
		Partnerships	Creating and maintaining strong, trusting relationships with community partners: A variety of partnerships built on mutual trust, which are formalized, with community members involved from the start.	Whitley et al., 2015
	External support	Ongoing support	No description.	Wiltsey Stirman et al., 2012
		Public support	The program has strong public support.	Schell et al., 2013
		Community involvement/support	No description.	Wiltsey Stirman et al., 2012
		Commitment community to the program	Community members are passionately committed to the program.	Schell et al., 2013
		National commitment	No description.	Bossert, 1990
		Stakeholders in other organizations provide support	Support from other organizations in the environment, for example, for in-kind resources such as expert advice in fund-raising, for political support, or to help mobilize clients to advocate for new funding.	Scheirer, 2005
	Community participation	Community participation	Involvement of the community in the program (collective attack, ownership, community capacity).	Shediac-Rizkallah & Bone, 1998
		Community participation	Involvement of the community in health care projects.	Bossert, 1990
		Community involvement/support	No description.	Wiltsey Stirman et al., 2012
		Community participation	Diverse community organizations are invested in the success of the program.	Schell et al., 2013
		Community involvement and ownership	Program is developed, implemented and evaluated with widespread community involvement and ownership.	Whitley et al., 2015
	Program champion (external)	Stakeholder involvement/support	No description.	Wiltsey Stirman et al., 2012
		Leadership support from outside of the organization	The program has leadership support from outside of the organization.	Schell et al., 2013
		Involvement community leaders	Community leaders are involved with the program.	Schell et al., 2013
		Champions (external)	No description.	Wiltsey Stirman et al., 2012
	Policy factors	Socioeconomic and political considerations	Favorable socioeconomic and political environment.	Shediac-Rizkallah & Bone, 1998
		Political factors	Strong governmental institutions, good political infrastructure, stable regime (Africa).	Bossert, 1990
		Alignment with policy	There is a favorable external environment for the program, that is, the values and mission fit well with community opinion, and the policy environment.	Hawe et al., 1999
		Legislation and regulations	The innovation fits within existing legislation and regulations established by the competent authorities (e.g. financial structures, substantive law and supervision from the Dutch Health Care Inspectorate or the Dutch Care Authority).	Fleuren et al., 2014
	Economic factors	Socioeconomic and political considerations	Favorable socioeconomic and political environment.	Shediac-Rizkallah & Bone, 1998
		Economic factors	Economic growth, strong economies (Africa).	Bossert, 1990
		Supportive state economic climate	The program exists in a supportive state economic climate.	Schell et al., 2013
	Program alignment with community opinion	Alignment with community opinion	Program aligns with community opinion (needs).	Casey et al., 2009
		Alignment with community opinion	There is a favorable external environment for the program, that is, the values and mission fit well with community opinion, and the policy environment.	Hawe et al., 1999
		Meaningful objectives	Program objectives meet the needs and interests of the community and the individuals.	Whitley et al., 2015
	Communication (external)	Communication with community leaders	The program communicates with community leaders.	Schell et al., 2013
		Communications	Strategic communication with stakeholders and the public about the program.	Schell et al., 2013
	(Perceived) benefits stakeholders	Perceived benefits	Staff members or key stakeholders perceive benefits to themselves and/or clients.	Scheirer, 2005
	Socio-cultural factors	Socio-cultural factors	No description.	Bossert, 1990
	Natural disasters	Natural disasters	No description.	Bossert, 1990
	Private sector	Private sector	No description.	Bossert, 1990
	Donor coordination	Donor coordination	No description.	Bossert, 1990

## Sheet: Blad2
Referentie	Definitie borging
Bossert, 1990	Sustainability: continuation of program activities after the donor funding ceases.
Casey et al., 2007	The continuation of a program, or program activities within an organization is often referred to as intitutionalization, or the long-term survival of programs beyond an initial funding period.
Fleuren et al., 2014	Continuation (of an innovation).
Glasgow et al., 1999	Maintenance: extent to which a program is sustained over time; the extent to which a health promotion practice or policy becomes routine and part of the everyday culture and norms of an organization (institutionalization); extent to which innovations become a relatively stable, enduring part of the organization.
Finch & Donaldson, 2009	Maintenance: the extent to which the intervention is sustained over time.
Schell et al., 2013	Sustainability capacity: the existence of structures and processes that allow a program to leverage resources to effectively implement and maintain evidence-based policies and activities.
Shediac-Rizkallah & Bone, 1998	Sustainability: continuation of the program activities within an organizational structure.
Stirman et al., 2012	Sustainability: a program or intervention may be considered to be sustained at a given point in time if, after initial implementation support has been withdrawn, core elements are maintained (e.g. remain recognizable) or deliverd at a sufficient level of fidelity or intensity to yield desired heaklth outcomes and adequate capacity for continuation of these elements is maintained.
Weisbrod et al., 1992	The process of achieving adoption of programs by other organizations, or program persistence within organizations, has been termed institutionalization.
